# Supplementary material
Source: ML conference proceedings conference paper supplement (https://proceedings.neurips.cc/paper_files/paper/2017/hash/0bed45bd5774ffddc95ffe500024f628-Abstract.html)
Supplement: Supplementary file [file 0bed45bd5774ffddc95ffe500024f628-Supplemental.zip]

# Supplementary material for “Real-Time Bidding with Side Information”

**Assumption 1.** The random variables  $V$  and  $P$  are conditionally independent given  $X$ . Moreover, there exists  $\theta_* \in \mathbb{R}^d$  such that  $\mathbb{E}[V \mid X] = X^\top \theta_*$  and  $\|\theta_*\|_\infty \leq 1$ .

**Assumption 2.** (a)  $B/T = \beta$  is a constant independent of any other relevant quantities.

(b) There exists  $r > 0$ , known to the advertiser, such that  $p_t \geq r$  for all  $t \in \mathbb{N}$ .

(c) We have  $\mathbb{E}[1/X^\top \theta_*] < \infty$ .

(d) The random variable  $P$  has a continuous conditional probability density function given the occurrence of the value  $x$  of  $X$ , denoted by  $f_x(\cdot)$ , that is upper bounded by  $\bar{L} < \infty$ .

---

**Algorithm 1:** Interval updating procedure at the end of phase  $k$

---

**Data:**  $\bar{\lambda}_k, \underline{\lambda}_k, \Delta_k = 3\sqrt{2\ln(2T)/N_k}$ , and  $\hat{\phi}_k(\lambda, \mathcal{C})$  for any  $\lambda \geq \underline{\lambda}_k$

**Result:**  $\bar{\lambda}_{k+1}$  and  $\underline{\lambda}_{k+1}$

$\bar{\gamma}_k = \bar{\lambda}_k, \underline{\gamma}_k = \underline{\lambda}_k$ ;

**while**  $\hat{\phi}_k(\bar{\gamma}_k, \mathcal{C}) > \beta + \Delta_k$  **do**

$\bar{\gamma}_k = \bar{\gamma}_k + |I_k|, \underline{\gamma}_k = \underline{\gamma}_k + |I_k|$ ;

**end**

**if**  $\hat{\phi}_k(1/2\bar{\gamma}_k + 1/2\underline{\gamma}_k, \mathcal{C}) \leq \beta + \Delta_k$  **then**

$\bar{\lambda}_{k+1} = 1/2\bar{\gamma}_k + 1/2\underline{\gamma}_k, \underline{\lambda}_{k+1} = \underline{\gamma}_k$ ;

**else**

$\bar{\lambda}_{k+1} = \bar{\gamma}_k, \underline{\lambda}_{k+1} = 1/2\bar{\gamma}_k + 1/2\underline{\gamma}_k$ ;

**end**

---

## A Proof of Lemma 1

**Lemma 1.** The optimal non-anticipating strategy is to bid  $b_t = x_t^\top \theta_*$  at any time period  $t \in \mathbb{N}$  and we have  $\text{ER}_{\text{OPT}}(T) = \sum_{t=1}^T \mathbb{E}[(x_t^\top \theta_* - p_t)_+]$ .

*Proof.* Consider any non-anticipating algorithm. The expected reward obtained at period  $t \in \mathbb{N}$  is:

$$\begin{aligned} \mathbb{E}[(v_t - p_t) \cdot \mathbb{1}_{b_t \geq p_t}] &= \mathbb{E}[\mathbb{E}[(v_t - p_t) \cdot \mathbb{1}_{b_t \geq p_t} \mid \tilde{\mathcal{F}}_{t-1}]] \\ &= \mathbb{E}[(\mathbb{E}[v_t \mid \tilde{\mathcal{F}}_{t-1}, b_t] - p_t) \cdot \mathbb{1}_{b_t \geq p_t}] \\ &= \mathbb{E}[(x_t^\top \theta_* - p_t) \cdot \mathbb{1}_{b_t \geq p_t}] \\ &\leq \mathbb{E}[(x_t^\top \theta_* - p_t)_+]. \end{aligned}$$

To derive the second equality, we use the fact that  $((x_\tau, v_\tau, p_\tau))_{\tau \in \mathbb{N}}$  is an i.i.d. sequence, that  $(v_t, p_t)$  is independent of  $b_t$  conditioned on  $x_t$  since the algorithm is non-anticipating, and that  $v_t$  is independent of  $p_t$  conditioned on  $x_t$ . This shows that:

$$\text{ER}_{\text{OPT}}(T) \leq \sum_{t=1}^T \mathbb{E}[(x_t^\top \theta_* - p_t)_+].$$

Moreover, this last inequality is in fact an equality since bidding  $b_t = x_t^\top \theta_*$  at any time period  $t \in \mathbb{N}$  yields the expected reward:

$$\begin{aligned} \mathbb{E}[(v_t - p_t) \cdot \mathbb{1}_{x_t^\top \theta_* \geq p_t}] &= \mathbb{E}[\mathbb{E}[(v_t - p_t) \cdot \mathbb{1}_{x_t^\top \theta_* \geq p_t} \mid \tilde{\mathcal{F}}_{t-1}]] \\ &= \mathbb{E}[(\mathbb{E}[v_t \mid \tilde{\mathcal{F}}_{t-1}] - p_t) \cdot \mathbb{1}_{x_t^\top \theta_* \geq p_t}] \\ &= \mathbb{E}[(x_t^\top \theta_* - p_t) \cdot \mathbb{1}_{x_t^\top \theta_* \geq p_t}] \\ &= \mathbb{E}[(x_t^\top \theta_* - p_t)_+]. \end{aligned}$$

□

## B Proof of Lemma 2

At any round  $t$ , we bid:

$$b_t = \max(0, \min(1, \max_{\theta \in \mathcal{C}_t} \theta^\top x_t)) = \max(0, \min(1, \hat{\theta}_t^\top x_t + \delta_T \cdot \sqrt{x_t^\top M_t^{-1} x_t})). \quad (1)$$

**Lemma 2.** *We have  $\mathbb{P}[\theta^* \notin \cap_{t=1}^T \mathcal{C}_t] \leq \frac{1}{T}$ .*

*Proof.* This is almost a direct consequence of Theorems 1 and 2 of [1] with the minor change (in their notations):  $\eta_t = (v_t - x_t^\top \theta_*) \cdot \mathbb{1}_{b_t \geq p_t}$ ,  $X_t = \mathbb{1}_{b_t \geq p_t} \cdot x_t$ , and  $Y_t = v_t \cdot \mathbb{1}_{b_t \geq p_t}$ . Defining the  $\sigma$ -algebra  $F_t = \sigma(x_1, \dots, x_{t+1}, p_1, \dots, p_{t+1}, v_1, \dots, v_t)$ , observe that  $X_t$  is  $F_{t-1}$ -measurable since (1) defines a non-anticipating algorithm, that  $\eta_t$  is  $F_t$ -measurable, and that  $\eta_t \in [-1, 1]$  and has mean 0 conditioned on  $F_{t-1}$  since  $v_t$  is independent of  $p_t$  conditioned on  $x_t$  with mean  $x_t^\top \theta_*$  and since  $((x_\tau, v_\tau, p_\tau))_{\tau \in \mathbb{N}}$  is an i.i.d. sequence. This implies that the assumptions of Theorems 1 and 2 of [1] are satisfied with  $R = 1$ ,  $V = I_d$ ,  $S = \sqrt{d}$  (since  $\|\theta_*\|_\infty \leq 1$ ),  $\delta = 1/T$ , and  $L = \sqrt{d}$  (since  $\|x_t\|_\infty \leq 1$ ). □

## C Proof of Theorem 1

**Theorem 1.** *Bidding according to (1) incurs a regret  $R_T = \tilde{O}(d \cdot \sqrt{T})$ .*

*Proof.* At any time period  $t \in \mathbb{N}$ , we denote by  $\tilde{\theta}_t$  an arbitrary element of  $\operatorname{argmax}_{\theta \in \mathcal{C}_t} x_t^\top \theta$  so that  $b_t = \max(0, \min(1, x_t^\top \tilde{\theta}_t))$ . Using Lemma 1, we have:

$$\begin{aligned} R_T &= \sum_{t=1}^T \mathbb{E}[(x_t^\top \theta_* - p_t)_+] - \sum_{t=1}^T \mathbb{E}[(v_t - p_t) \cdot \mathbb{1}_{b_t \geq p_t}] \\ &= \sum_{t=1}^T \mathbb{E}[(x_t^\top \theta_* - p_t)_+] - \sum_{t=1}^T \mathbb{E}[(x_t^\top \theta_* - p_t) \cdot \mathbb{1}_{b_t \geq p_t}]. \end{aligned}$$

The second equality is derived by conditioning on  $\tilde{\mathcal{F}}_{t-1}$  in the same fashion as done in the proof of Lemma 1 since  $b_t$  is entirely determined by  $\tilde{\mathcal{F}}_{t-1}$ , see (1). Observe that:

$$\begin{aligned} (x_t^\top \theta_* - p_t)_+ &= (x_t^\top \theta_* - p_t)_+ \cdot \mathbb{1}_{x_t^\top \theta_* \geq p_t > b_t} + (x_t^\top \theta_* - p_t)_+ \cdot \mathbb{1}_{b_t \geq p_t} \\ &\leq (x_t^\top \theta_* - p_t)_+ \cdot \mathbb{1}_{x_t^\top \theta_* > b_t} + (x_t^\top \theta_* - p_t)_+ \cdot \mathbb{1}_{b_t \geq p_t} \\ &\leq \mathbb{1}_{x_t^\top \theta_* > b_t} + (x_t^\top \theta_* - p_t)_+ \cdot \mathbb{1}_{b_t \geq p_t}, \end{aligned}$$

since  $v_t \in [0, 1]$  (which implies that  $x_t^\top \theta_* = \mathbb{E}[v_t | x_t] \in [0, 1]$ ) and  $p_t \geq 0$ . Plugging this inequality back into the regret bound yields:

$$\begin{aligned} R_T &\leq \sum_{t=1}^T \mathbb{P}[x_t^\top \theta_* > b_t] + \mathbb{E}[(x_t^\top \theta_* - p_t)_+ - (x_t^\top \theta_* - p_t) \cdot \mathbb{1}_{b_t \geq p_t}] \\ &= \sum_{t=1}^T \mathbb{P}[x_t^\top \theta_* > b_t] + \mathbb{E}[(p_t - x_t^\top \theta_*)_+ \cdot \mathbb{1}_{b_t \geq p_t}]. \end{aligned} \quad (2)$$

Since  $x_t^\top \theta_* \in [0, 1]$ ,  $x_t^\top \theta_* > b_t$  implies that  $x_t^\top \theta_* > \max_{\theta \in \mathcal{C}_t} x_t^\top \theta$  and we conclude that  $\theta_* \notin \mathcal{C}_t$ . Using Lemma 2, we get:

$$\sum_{t=1}^T \mathbb{P}[x_t^\top \theta_* > b_t] \leq \sum_{t=1}^T \mathbb{P}[\theta_* \notin \mathcal{C}_t] \leq 1.$$

What remains to be done is to upper bound the second term in the right-hand side of (2). Using Fubini's theorem, we have:

$$\begin{aligned} \sum_{t=1}^T \mathbb{E}[(p_t - x_t^\top \theta_*)_+ \cdot \mathbb{1}_{b_t \geq p_t}] &= \int_0^\infty \mathbb{E}[\sum_{t=1}^T \mathbb{1}_{p_t - x_t^\top \theta_* \geq u} \cdot \mathbb{1}_{b_t \geq p_t}] du \\ &\leq \int_0^\infty \mathbb{E}[\sum_{t=1}^T \mathbb{1}_{b_t - x_t^\top \theta_* \geq u} \cdot \mathbb{1}_{b_t \geq p_t}] du \\ &= \mathbb{E}[\sum_{t=1}^T (b_t - x_t^\top \theta_*)_+ \cdot \mathbb{1}_{b_t \geq p_t}]. \end{aligned} \quad (3)$$

Using Lemma 2, we have that  $\theta_* \in \mathcal{C}_t$  (which implies  $\|\tilde{\theta}_t - \theta_*\|_{M_t} \leq 2\delta_T$ ) for all  $t \in \{t, \dots, T\}$  with probability at least  $1 - 1/T$ . Using the shorthand  $E = \{\theta_* \in \cap_{t=1}^T \mathcal{C}_t\}$ , we get:

$$\begin{aligned} \sum_{t=1}^T \mathbb{E}[(b_t - x_t^\top \theta_*)_+ \cdot \mathbb{1}_{b_t \geq p_t}] &\leq T \cdot \mathbb{P}[E^c] + \mathbb{E}[\mathbb{1}_E \cdot \sum_{t=1}^T (b_t - x_t^\top \theta_*)_+ \cdot \mathbb{1}_{b_t \geq p_t}] \\ &\leq 1 + \mathbb{E}[\mathbb{1}_E \cdot \sum_{t=1}^T |x_t^\top \tilde{\theta}_t - x_t^\top \theta_*| \cdot \mathbb{1}_{b_t \geq p_t}] \\ &\leq 1 + \mathbb{E}[\mathbb{1}_E \cdot \sum_{t=1}^T \|\mathbb{1}_{b_t \geq p_t} \cdot x_t\|_{M_t^{-1}} \cdot \|\tilde{\theta}_t - \theta_*\|_{M_t}] \\ &\leq 1 + 2\delta_T \cdot \mathbb{E}[\sum_{t=1}^T \|\mathbb{1}_{b_t \geq p_t} \cdot x_t\|_{M_t^{-1}}] \\ &\leq 1 + 2\delta_T \cdot \sqrt{d \cdot T \cdot \ln(T)}, \end{aligned}$$

where we use  $b_t \in [0, 1]$  and  $x_t^\top \theta_* \in [0, 1]$  for the first inequality and where the last inequality is derived in Lemma 3 of [2].  $\square$

## D Proof of Theorem 2

We bid:

$$b_t = \max(0, \min(1, \max_{\theta \in \mathcal{C}_{\tau_t}} \theta^\top x_t)), \quad (4)$$

at any round  $t$ , where  $\tau_t$  is the last round before round  $t$  where the last batch update happened.

**Theorem 2.** *Bidding according to (4) at any round  $t$  incurs a regret  $R_T = \tilde{O}(d \cdot \sqrt{A \cdot T})$ .*

*Proof.* At any time period  $t \in \mathbb{N}$ , we denote by  $\tilde{\theta}_t$  an arbitrary element of  $\operatorname{argmax}_{\theta \in \mathcal{C}_{\tau_t}} x_t^\top \theta$ . The proof is along the same lines as for Theorem 1 except for two inequalities. First, we

now bound the first term in the right-hand side of 2 as follows:

$$\begin{aligned}
\sum_{t=1}^T \mathbb{P}[x_t^\top \theta_* > b_t] &\leq \sum_{t=1}^T \mathbb{P}[\theta_* \notin \mathcal{C}_{\tau_t}] \\
&\leq \sum_{t=1}^T \mathbb{P}[\theta_* \notin \cap_{\tau=1}^T \mathcal{C}_\tau] \\
&\leq 1,
\end{aligned}$$

which leads to the same conclusion. Second, using the shorthand  $E = \{\theta_* \in \cap_{t=1}^T \mathcal{C}_t\}$ , we bound the right-hand side of (3) as follows:

$$\begin{aligned}
\mathbb{E}[\sum_{t=1}^T (b_t - x_t^\top \theta_*)_+ \cdot \mathbb{1}_{b_t \geq p_t}] &\leq T \cdot \mathbb{P}[E^c] + \mathbb{E}[\mathbb{1}_E \cdot \sum_{t=1}^T |x_t^\top \tilde{\theta}_t - x_t^\top \theta_*| \cdot \mathbb{1}_{b_t \geq p_t}] \\
&\leq 1 + 2\sqrt{1+A} \cdot \delta_T \cdot \mathbb{E}[\sum_{t=1}^T \|\mathbb{1}_{b_t \geq p_t} \cdot x_t\|_{M_t^{-1}}] \\
&\leq 1 + 2\sqrt{1+A} \cdot \delta_T \cdot \sqrt{d \cdot T \cdot \ln(T)},
\end{aligned}$$

where the second inequality is a direct consequence of the proof of Theorem 4 in [1] and the last inequality is derived in Lemma 11 of [2] just like for Theorem 1.  $\square$

## E Proof of Lemma 3

**Lemma 3.** *We have  $\text{ER}_{\text{OPT}}(B, T) \leq T \cdot R(\lambda_*, \mathcal{C}) + \sqrt{T}/r + 1$ , where  $\lambda_* \geq 0$  satisfies  $\phi(\lambda_*, \mathcal{C}) = \beta$  or  $\lambda_* = 0$  if no such solution exists (i.e. if  $\mathbb{E}[P] < \beta$ ) in which case  $\phi(\lambda_*, \mathcal{C}) \leq \beta$ .*

*Proof.* There are two cases depending on whether  $\mathbb{E}[P] \geq \beta$  or not.

**Case 1:**  $\mathbb{E}[P] < \beta$ .

In this case  $\lambda_* = 0$  and the total expected reward obtained by any non-anticipating algorithm is:

$$\begin{aligned}
\mathbb{E}[\sum_{t=1}^{\tau^*-1} v_t \cdot \mathbb{1}_{b_t \geq p_t}] &\leq \mathbb{E}[\sum_{t=1}^T v_t] \\
&= T \cdot \mathbb{E}[V] \\
&= T \cdot \mathbb{E}[\mathbb{E}[V \mid X]] \\
&= T \cdot \mathbb{E}[g(X)],
\end{aligned}$$

which shows that  $\text{ER}_{\text{OPT}}(B, T) \leq T \cdot R(\lambda_*, \mathcal{C})$ .

**Case 2:**  $\mathbb{E}[P] \geq \beta$ .

The total expected reward obtained by any non-anticipating algorithm can be bounded as

follows:

$$\begin{aligned}
\mathbb{E}\left[\sum_{t=1}^{\tau^*-1} v_t \cdot \mathbb{1}_{b_t \geq p_t}\right] &\leq \mathbb{E}\left[\sum_{t=1}^{\tau^*} v_t \cdot \mathbb{1}_{b_t \geq p_t}\right] \\
&= \sum_{t=1}^{\infty} \mathbb{E}[I_{\tau^* \geq t} \cdot v_t \cdot \mathbb{1}_{b_t \geq p_t}] \\
&= \sum_{t=1}^{\infty} \mathbb{E}[I_{\tau^* \geq t} \cdot \mathbb{E}[v_t \mid \tilde{\mathcal{F}}_{t-1}, b_t] \cdot \mathbb{1}_{b_t \geq p_t}] \\
&= \sum_{t=1}^{\infty} \mathbb{E}[I_{\tau^* \geq t} \cdot \min(1, \max_{\theta \in \mathcal{C}} x_t^\top \theta) \cdot \mathbb{1}_{b_t \geq p_t}] \\
&= \mathbb{E}\left[\sum_{t=1}^{\tau^*} \min(1, \max_{\theta \in \mathcal{C}} x_t^\top \theta) \cdot \mathbb{1}_{b_t \geq p_t}\right] \\
&\leq \mathbb{E}\left[\sum_{t=1}^{\tau^*-1} \min(1, \max_{\theta \in \mathcal{C}} x_t^\top \theta) \cdot \mathbb{1}_{b_t \geq p_t}\right] + 1,
\end{aligned}$$

where we use the fact that  $((x_t, v_t, p_t))_{t \in \mathbb{N}}$  is an i.i.d. sequence, that  $(v_t, p_t)$  is independent of  $b_t$  conditioned on  $x_t$  since the algorithm is non-anticipating, that  $v_t$  is independent of  $p_t$  conditioned on  $x_t$ , and that  $\tau^*$  is a stopping time with respect to  $((x_t, v_t, p_t))_{t \in \mathbb{N}}$ . As a result, up to a constant additive term in the final bound, we just need to bound the performance of any non-anticipating algorithm when the reward obtained at round  $t$  is  $\min(1, \max_{\theta \in \mathcal{C}} x_t^\top \theta) \cdot \mathbb{1}_{b_t \geq p_t}$  as opposed to  $v_t \cdot \mathbb{1}_{b_t \geq p_t}$ . Observe that, in this setting, the total reward (resp. cost) obtained (resp. incurred) by any non-anticipating algorithm can be written as  $\sum_{t=1}^T \min(1, \max_{\theta \in \mathcal{C}} x_t^\top \theta) \cdot y_t$  (resp.  $\sum_{t=1}^T p_t \cdot y_t$ ) where  $y_t = \mathbb{1}_{b_t \geq p_t}$  for  $t < \tau^*$  and  $y_t = 0$  for  $t \geq \tau^*$ . Remark that  $y_t \in [0, 1]$  for all  $t \in \{1, \dots, T\}$  and that, by definition of  $\tau^*$ ,  $\sum_{t=1}^T p_t \cdot y_t \leq B$ . Thus  $(y_t)_{t=1, \dots, T}$  is always a feasible solution to the knapsack problem:

$$\begin{aligned}
&\sup_{(\xi_t)_{t=1, \dots, T}} \sum_{t=1}^T \min(1, \max_{\theta \in \mathcal{C}} x_t^\top \theta) \cdot \xi_t \\
&\text{subject to } \sum_{t=1}^T p_t \cdot \xi_t \leq B \\
&\xi_t \in [0, 1], \quad t = 1, \dots, T.
\end{aligned} \tag{5}$$

As a consequence, we conclude that the expected total reward obtained by any non-anticipating algorithm is always no larger than the expected optimal value of (5). This reduces the problem of bounding  $\text{ER}_{\text{OPT}}(B, T)$  to a stochastic i.i.d. knapsack problem with  $T$  items and a knapsack capacity of  $B$  when the  $t$ -th item has value  $\min(1, \max_{\theta \in \mathcal{C}} x_t^\top \theta)$  and weights  $p_t$ . The authors of [5] study general stochastic knapsack problems and, adapting their results to our notations, show that the expected optimal value of (5) is equal to  $T \cdot R(\lambda_*, \mathcal{C}) + O(1)$ , under technical conditions discussed in their paper. For the purpose of being self-contained and in order to relax some of the assumptions made in [5], we derive a weaker bound that will suit our needs. It is well known that filling up the knapsack with the items sorted in descending order of their value-to-weight ratios until the knapsack is full, possibly using a fractional value for the last item, defines an optimal solution to (5), which we denote by  $(\xi_t^*)_{t=1, \dots, T}$ . In what follows, we use the shorthand notations  $z_t = \min(1, \max_{\theta \in \mathcal{C}} x_t^\top \theta)$  and  $\xi_t = \mathbb{1}_{z_t \geq \lambda_* \cdot p_t}$ , for  $t = 1, \dots, T$ . The expected

optimal value of (5) can be bounded as follows:

$$\begin{aligned}
\mathbb{E}[\sum_{t=1}^T z_t \cdot \xi_t^*] &\leq \mathbb{E}[\sum_{t=1}^T z_t \cdot \xi_t + \mathbb{1}_{\sum_{t=1}^T p_t \cdot \xi_t \leq B} \cdot \sum_{t=1}^T z_t \cdot (\xi_t^* - \xi_t)] \\
&= T \cdot R(\lambda_*, \mathcal{C}) + \mathbb{E}[\mathbb{1}_{\sum_{t=1}^T p_t \cdot \xi_t \leq B} \cdot \sum_{t=1}^T z_t \cdot (\xi_t^* - \xi_t)] \\
&\leq T \cdot R(\lambda_*, \mathcal{C}) + \mathbb{E}[\mathbb{1}_{\sum_{t=1}^T p_t \cdot \xi_t \leq B} \cdot \sum_{t=1}^T \frac{p_t}{r} \cdot (\xi_t^* - \xi_t)] \\
&\leq T \cdot R(\lambda_*, \mathcal{C}) + \frac{1}{r} \cdot \mathbb{E}[\mathbb{1}_{\sum_{t=1}^T p_t \cdot \xi_t \leq B} \cdot (B - \sum_{t=1}^T p_t \cdot \xi_t)] \\
&\leq T \cdot R(\lambda_*, \mathcal{C}) + \frac{1}{r} \cdot \mathbb{E}[|\sum_{t=1}^T (\beta - p_t \cdot \xi_t)|] \\
&= T \cdot R(\lambda_*, \mathcal{C}) + \frac{1}{r} \cdot \mathbb{E}[|\sum_{t=1}^T \epsilon_t \cdot p_t \cdot \xi_t|] \\
&\leq T \cdot R(\lambda_*, \mathcal{C}) + \frac{1}{r} \cdot \mathbb{E}[\sqrt{\sum_{t=1}^T |p_t \cdot \xi_t|^2}] \\
&\leq T \cdot R(\lambda_*, \mathcal{C}) + \frac{\sqrt{T}}{r},
\end{aligned}$$

where  $(\epsilon_t)_{t=1, \dots, T}$  is a collection of  $T$  independent Rademacher variables that are jointly independent of  $((x_t, p_t))_{t=1, \dots, T}$ . The first inequality is a consequence of the inequality  $\xi_t \geq \xi_t^*$  that holds for any  $t = 1, \dots, T$  when  $\sum_{t=1}^T p_t \cdot \xi_t > B$ . This follows from the definition of  $\xi_t^*$  and the fact that, in this case, we cannot fit all items of value-to-weight ratio at least  $\lambda_*$  in the knapsack when  $\sum_{t=1}^T p_t \cdot \xi_t > B$ . The first equality is a consequence of  $\mathbb{E}[z_t \cdot \xi_t] = R(\lambda_*, \mathcal{C})$ , which holds by definition of  $z_t$  and  $\xi_t$ . The second inequality is a consequence of  $z_t \leq 1 \leq \frac{p_t}{r}$  by Assumption 2 and  $\xi_t \leq \xi_t^*$  for any  $t = 1, \dots, T$  when  $\sum_{t=1}^T p_t \cdot \xi_t \leq B$  given the definition of  $\xi_t^*$  and the fact that, in this case, the combination of all items of value-to-weight ratio at least  $\lambda_*$  fit in the knapsack. The third inequality is a consequence of  $\sum_{t=1}^T p_t \cdot \xi_t^* \leq B$  since  $(\xi_t^*)_{t=1, \dots, T}$  is a feasible solution to (5). The fourth inequality is a consequence of  $x \cdot \mathbb{1}_{x \geq 0} \leq |x|$  for all  $x \in \mathbb{R}$ . The second equality is obtained by symmetrization since  $p_t \cdot \xi_t$  has mean  $\phi(\lambda_*, \mathcal{C}) = \beta$  for any  $t = 1, \dots, T$ . The fifth inequality is a direct consequence of the Khintchine inequality. The last inequality results from  $p_t \in [0, 1]$  and  $\xi_t \in [0, 1]$ . This concludes the proof.  $\square$

## F Proof of Lemma 4

**Lemma 4.** *For any  $\lambda_1, \lambda_2 \geq 0$ , we have:  $|R(\lambda_1, \mathcal{C}) - R(\lambda_2, \mathcal{C})| \leq 1/r \cdot |\phi(\lambda_1, \mathcal{C}) - \phi(\lambda_2, \mathcal{C})|$ .*

*Proof.* For any  $\lambda_1 \geq \lambda_2 \geq 0$ , we have:

$$\begin{aligned}
|R(\lambda_1, \mathcal{C}) - R(\lambda_2, \mathcal{C})| &= \mathbb{E}[g(X) \cdot \mathbb{1}_{g(X)/\lambda_2 \geq P > g(X)/\lambda_1}] \\
&\leq \frac{1}{r} \cdot \mathbb{E}[P \cdot \mathbb{1}_{g(X)/\lambda_2 \geq P > g(X)/\lambda_1}] \\
&= \frac{1}{r} \cdot |\phi(\lambda_1, \mathcal{C}) - \phi(\lambda_2, \mathcal{C})|,
\end{aligned}$$

where the first inequality is a consequence of  $g(X) \in [0, 1]$  and  $P \geq r$ .  $\square$

## G Proof of Lemma 5

**Lemma 5.**  $\phi(\cdot, \mathcal{C})$  is  $\bar{L} \cdot \mathbb{E}[1/X^\top \theta_*]$ -Lipschitz.

*Proof.* For any  $\lambda_2 \geq \lambda_1 > 0$ , we have:

$$\begin{aligned}
|\phi(\lambda_2, \mathcal{C}) - \phi(\lambda_1, \mathcal{C})| &= \mathbb{E}[P \cdot \mathbb{1}_{\min(1, g(X)/\lambda_1) \geq P > \min(1, g(X)/\lambda_2)}] \\
&\leq \mathbb{E}[\mathbb{1}_{\min(1, g(X)/\lambda_1) \geq P > \min(1, g(X)/\lambda_2)}] \\
&= \mathbb{E}\left[\int_{\min(1, g(X)/\lambda_2)}^{\min(1, g(X)/\lambda_1)} f_X(w) dw\right] \\
&\leq \bar{L} \cdot \mathbb{E}[\min(1, g(X)/\lambda_1) - \min(1, g(X)/\lambda_2)] \\
&\leq \bar{L} \cdot \mathbb{E}\left[\frac{1}{g(X)}\right] \cdot |\lambda_1 - \lambda_2| \\
&\leq \bar{L} \cdot \mathbb{E}\left[\frac{1}{X^\top \theta_*}\right] \cdot |\lambda_1 - \lambda_2|,
\end{aligned}$$

where the first inequality is obtained using  $P \in [0, 1]$ , the second inequality is a consequence of Assumption 2, the third inequality actually holds almost surely irrespective of whether  $g(X)/\lambda_1 \leq 1$ ,  $g(X)/\lambda_1 > 1$ ,  $g(X)/\lambda_2 \leq 1$ , or  $g(X)/\lambda_2 > 1$ , and the last inequality is obtained using the fact that  $\theta_* \in \mathcal{C}$ . Also, observe that the last inequality holds even when  $\lambda_1 = 0$ .  $\square$

## H Proof of Lemma 6

**Lemma 6.** We have  $\mathbb{P}[\sup_{\lambda \in [\lambda_k, 2/r]} |\hat{\phi}_k(\lambda, \mathcal{C}) - \phi(\lambda, \mathcal{C})| \leq \Delta_k] \geq 1 - 1/T$ , for any  $k$ .

*Proof.* For any phase  $k \in \mathbb{N}$ , we denote by  $t_k$  the time period at which phase  $k$  starts. First note that we can reason conditionally on  $\mathcal{F}_{t_{k-1}}$  since  $((x_t, v_t, p_t))_{t \in \mathbb{N}}$  is an i.i.d. stochastic process. We use the Rademacher complexity approach to concentration inequalities for empirical processes to derive the result, see, for example, [3] and [4]. Specifically, the class of functions of interest is  $\mathcal{F} = \{\ell_\lambda : (x, y) \in [0, 1] \times [r, 1] \rightarrow y \cdot \mathbb{1}_{x \geq \lambda \cdot y} \mid \lambda \in [\lambda_k, 2/r]\}$ . Observe that  $\ell_\lambda(x, y) \in [0, 1]$  for any  $(x, y) \in [0, 1] \times [r, 1]$  and that  $\phi(\lambda, \mathcal{C}) = \mathbb{E}[\ell_\lambda(g(X), P)]$ . Moreover, note that  $N_k$  samples, denoted by  $(\min(1, \max_{\theta \in \mathcal{C}} X_n^\top \theta), P_n)_{n=1, \dots, N_k}$ , have been generated according to the same distribution as  $(g(X), P)$  in an i.i.d. fashion at the end of phase  $k$ . Using Theorem 3.2 from [4], we get:

$$\mathbb{P}[\exists \lambda \in [\lambda_k, 2/r] \mid \hat{\phi}_k(\lambda, \mathcal{C}) - \phi(\lambda, \mathcal{C})| \geq 2\mathcal{R}_{N_k}(\mathcal{F}) + t \mid \mathcal{F}_{t_{k-1}}] \leq \exp(-2N_k \cdot t^2) \quad \forall t \geq 0, \tag{6}$$

where  $\mathcal{R}_{N_k}(\mathcal{F})$  is the Rademacher complexity of  $\mathcal{F}$  for  $N_k$  samples. What remains to be done is to upper bound this last quantity. By definition, we have, for  $N_k$  independent

Rademacher variables  $(\epsilon_n)_{n=1, \dots, N_k}$  that are independent of  $(X_n, P_n)_{n=1, \dots, N_k}$ :

$$\begin{aligned}
\mathcal{R}_{N_k}(\mathcal{F}) &= \frac{1}{N_k} \cdot \mathbb{E} \left[ \sup_{\lambda \in [\lambda_k, 2/r]} \left| \sum_{n=1}^{N_k} \epsilon_n \cdot \ell_\lambda(\min(1, \max_{\theta \in \mathcal{C}} X_n^\top \theta), P_n) \right| \right] \\
&= \frac{1}{N_k} \cdot \mathbb{E} \left[ \mathbb{E} \left[ \sup_{z \in S((X_n, P_n)_{n=1, \dots, N_k})} \left| \sum_{n=1}^{N_k} \epsilon_n \cdot z_n \right| \mid (X_n, P_n)_{n=1, \dots, N_k} \right] \right] \\
&\leq \frac{1}{N_k} \cdot \mathbb{E} \left[ \sqrt{2N_k \cdot \ln(2|S((X_n, P_n)_{n=1, \dots, N_k})|)} \right] \\
&\leq \sqrt{\frac{2 \ln(2(N_k + 1))}{N_k}} \\
&\leq \sqrt{\frac{2 \ln(2T)}{N_k}},
\end{aligned}$$

with:

$$S((X_n, P_n)_{n=1, \dots, N_k}) = \{(P_{f(n)} \cdot \mathbb{1}_{\min(1, \max_{\theta \in \mathcal{C}} X_{f(n)}^\top \theta)/P_{f(n)} \geq \lambda})_{n=1, \dots, N_k} \mid \lambda \geq 0\},$$

where the permutation  $f(\cdot)$  of  $\{1, \dots, N_k\}$  is determined by:

$$\min(1, \max_{\theta \in \mathcal{C}} X_{f(n)}^\top \theta)/P_{f(n)} \leq \dots \leq \min(1, \max_{\theta \in \mathcal{C}} X_{f(1)}^\top \theta)/P_{f(1)}.$$

The second equality is obtained by reindexing the vector  $(z_1, \dots, z_{N_k})$  according to the mapping  $f(\cdot)$  which does not change the inner expectation since  $(\epsilon_n)_{n=1, \dots, N_k}$  is independent of  $(X_n, P_n)_{n=1, \dots, N_k}$ . Note that  $S((X_n, P_n)_{n=1, \dots, N_k})$  is always a finite set with cardinality no larger than  $N_k + 1$ , which yields the second and third inequality using standard bounds on the Rademacher complexity of a finite set, see Theorem 3.3 of [4]. Plugging  $t = \sqrt{\frac{2 \ln(2T)}{N_k}}$  in (6) and using the definition of  $\Delta_k$ , we conclude that:

$$\mathbb{P}[\exists \lambda \in [\lambda_k, 2/r] \mid \hat{\phi}_k(\lambda, \mathcal{C}) - \phi(\lambda, \mathcal{C}) \geq \Delta_k \mid \mathcal{F}_{t_{k-1}}] \leq \exp(-4 \ln(2T)) \leq 1/T,$$

which, in particular, implies that:

$$\mathbb{P} \left[ \sup_{\lambda \in [\lambda_k, 2/r]} |\hat{\phi}_k(\lambda, \mathcal{C}) - \phi(\lambda, \mathcal{C})| \leq \Delta_k \right] \geq 1 - 1/T.$$

□

## I Proof of Lemma 7

**Lemma 7.** For  $T \geq 3$ , we have  $\bar{k}_T \leq \ln(T + 1)$  and  $4^{\bar{k}_T} \leq \frac{T}{\ln^2(T)} + 1$ .

*Proof.* By definition, we have:

$$\begin{aligned}
T &\geq \sum_{k=0}^{\bar{k}_T-1} N_k \\
&\geq 3 \sum_{k=0}^{\bar{k}_T-1} 4^k \cdot \ln^2(T) \\
&\geq (4^{\bar{k}_T} - 1) \cdot \ln^2(T),
\end{aligned}$$

which implies  $4^{\bar{k}_T} \leq T/\ln^2(T) + 1$ . Since  $\ln^2(T) \geq 1$  for  $T \geq 3$ , we get  $4^{\bar{k}_T} \leq T + 1$ . Taking logarithms yields the claim since  $\ln(4) \geq 1$ . □



## J Proof of Lemma 8

**Lemma 8.** For  $C = \bar{L} \cdot \mathbb{E}[1/X^\top \theta_*]$  and provided that  $T \geq \exp(8r^2/C^2)$ , we have:

$$\mathbb{P}[\cap_{k=0}^{\bar{k}_T} \{|\hat{\phi}_k(\lambda_k, \mathcal{C}) - \phi(\lambda_*, \mathcal{C})| \leq 4C \cdot |I_k|, |\phi(\lambda_k, \mathcal{C}) - \phi(\lambda_*, \mathcal{C})| \leq 3C \cdot |I_k|\}] \geq 1 - \frac{2\ln^2(T)}{T},$$

*Proof.* To simplify the discussion, we assume that  $\mathbb{E}[P] \leq \beta$  so that  $\phi(\lambda_*, \mathcal{C}) = \beta$  but the discussion would be almost identical if  $\mathbb{E}[P] > \beta$  (in which case  $\lambda_* = 0$ ). For any  $k \in \{0, \dots, \bar{k}_T\}$ , we define the event:

$$A_k = \{\lambda_* \geq \lambda_k, |\hat{\phi}_k(\lambda_k, \mathcal{C}) - \beta| \leq 4C \cdot |I_k|, |\phi(\lambda_{k+1}, \mathcal{C}) - \beta| \leq 3C \cdot |I_{k+1}|\}.$$

Using the shorthand  $E = \cap_{k=0}^{\bar{k}_T} A_k$ , we have:

$$\mathbb{P}[E^c] \leq \sum_{k=0}^{\bar{k}_T} \mathbb{P}[A_k^c].$$

Note that we exclude the condition  $|\phi(\lambda_0, \mathcal{C}) - \beta| \leq 3C \cdot |I_0|$  from the definition of  $E$  since this condition is automatically satisfied almost surely given Lemma 5. By induction, we have:

$$\begin{aligned} \mathbb{P}[A_k^c] &\leq \mathbb{P}[A_0^c] + \sum_{j=0}^{k-1} \mathbb{P}[A_{j+1}^c \cap A_j] \\ &= \sum_{j=0}^{k-1} \mathbb{P}[A_{j+1}^c \cap A_j] \end{aligned}$$

for any  $k > 0$  since, by construction,  $\lambda_* \in [\lambda_0, \bar{\lambda}_0] = [0, 2/r]$  which implies that  $\mathbb{P}[A_0^c] = 0$ . Rearranging yields:

$$\begin{aligned} \mathbb{P}[E^c] &\leq \sum_{k=0}^{\bar{k}_T} (\bar{k}_T - k) \cdot \mathbb{P}[A_{k+1}^c \cap A_k] \\ &\leq \sum_{k=0}^{\bar{k}_T} (\bar{k}_T - k) \cdot \mathbb{P}[B_k^c] + \sum_{k=0}^{\bar{k}_T} (\bar{k}_T - k) \cdot \mathbb{P}[A_{k+1}^c \cap A_k \cap B_k] \\ &\leq \frac{1}{T} \cdot \bar{k}_T \cdot (\bar{k}_T + 1) + \sum_{k=0}^{\bar{k}_T} (\bar{k}_T - k) \cdot \mathbb{P}[A_{k+1}^c \cap A_k \cap B_k] \\ &\leq \frac{\ln(T+1)^2}{T} + \sum_{k=0}^{\bar{k}_T} (\bar{k}_T - k) \cdot \mathbb{P}[A_{k+1}^c \cap A_k \cap B_k], \end{aligned}$$

where  $B_k = \{\sup_{\lambda \in [\lambda_k, 2/r]} |\hat{\phi}_k(\lambda, \mathcal{C}) - \phi(\lambda, \mathcal{C})| \leq \Delta_k\}$ . We use Lemma 6 to derive the third inequality and Lemma 7 for the last inequality. What remains to be done is to show that the second term in the right-hand side is 0. Consider  $k \in \{1, \dots, \bar{k}_T\}$  and suppose that  $A_{k-1}$  and  $B_{k-1}$  hold. We show that  $A_k$  must hold which will imply that  $\mathbb{P}[A_k^c \cap A_{k-1} \cap B_{k-1}] = 0$ . First observe that we have:

$$\begin{aligned} |\hat{\phi}_k(\lambda_k, \mathcal{C}) - \beta| &\leq |\hat{\phi}_k(\lambda_k, \mathcal{C}) - \phi(\lambda_k, \mathcal{C})| + |\phi(\lambda_k, \mathcal{C}) - \beta| \\ &\leq \Delta_k + 3C \cdot |I_k| \\ &\leq 4C \cdot |I_k|, \end{aligned}$$

where we use the fact that  $A_{k-1}$  and  $B_{k-1}$  hold for the first inequality and the fact that  $T \geq \exp(8r^2/C^2)$  for the last inequality. At the end of Algorithm 1 for the  $k$ -th phase, we end up with an interval  $[\underline{\gamma}_k, \bar{\gamma}_k]$  of length  $|I_k|$  such that either (i)  $\underline{\gamma}_k > \lambda_k$  or (ii)  $\underline{\gamma}_k = \lambda_k$ . In situation (i), by definition of the ending criterion of Algorithm 1, we must have  $\hat{\phi}_k(\bar{\gamma}_k, \mathcal{C}) \leq \beta + \Delta_k$  and  $\hat{\phi}_k(\underline{\gamma}_k, \mathcal{C}) > \beta + \Delta_k$ . This last inequality, combined with the fact that  $B_{k-1}$  holds, implies that  $\phi(\underline{\gamma}_k, \mathcal{C}) > \beta$  and thus we have  $\underline{\gamma}_k \leq \lambda_*$ . In situation (ii), we automatically have  $\underline{\gamma}_k \leq \lambda_*$  since  $A_{k-1}$  holds. Moreover, by definition of the ending criterion of Algorithm 1, we must have  $\hat{\phi}_k(\bar{\gamma}_k, \mathcal{C}) \leq \beta + \Delta_k$ . We conclude that  $\underline{\gamma}_k \leq \lambda_*$  and:

$$\hat{\phi}_k(\bar{\gamma}_k, \mathcal{C}) \leq \beta + \Delta_k \quad (7)$$

irrespective of whether (i) or (ii) holds. There are several cases to consider at this point depending on the value of  $|\hat{\phi}_k(1/2\underline{\gamma}_k + 1/2\bar{\gamma}_k, \mathcal{C}) - \beta|$ . We show that, in any case, we have  $\lambda_{k+1} \leq \lambda_*$  and  $|\phi(\lambda_{k+1}, \mathcal{C}) - \beta| \leq 3C \cdot |I_{k+1}|$  which will conclude the proof.

**Case 1:**  $\hat{\phi}_k(1/2\underline{\gamma}_k + 1/2\bar{\gamma}_k, \mathcal{C}) < \beta - \Delta_k$ .

In this case, we have  $\lambda_{k+1} = \underline{\gamma}_k \leq \lambda_*$  and  $\bar{\lambda}_{k+1} = 1/2\underline{\gamma}_k + 1/2\bar{\gamma}_k$ . Using  $\hat{\phi}_k(\bar{\lambda}_{k+1}, \mathcal{C}) < \beta - \Delta_k$  along with the fact that  $B_{k-1}$  holds, we get  $\phi(\bar{\lambda}_{k+1}, \mathcal{C}) < \beta$  which implies that  $\lambda_* \in [\lambda_{k+1}, \bar{\lambda}_{k+1}]$  and, as a result,  $|\phi(\lambda_{k+1}, \mathcal{C}) - \beta| = |\phi(\lambda_{k+1}, \mathcal{C}) - \phi(\lambda_*, \mathcal{C})| \leq C \cdot |I_{k+1}|$  using Lemma 5.

**Case 2:**  $|\hat{\phi}_k(1/2\underline{\gamma}_k + 1/2\bar{\gamma}_k, \mathcal{C}) - \beta| \leq \Delta_k$ .

In this case, we have  $\lambda_{k+1} = \underline{\gamma}_k \leq \lambda_*$  and  $\bar{\lambda}_{k+1} = 1/2\underline{\gamma}_k + 1/2\bar{\gamma}_k$ . We get:

$$\begin{aligned} |\phi(\lambda_{k+1}, \mathcal{C}) - \beta| &= |\phi(\lambda_{k+1}, \mathcal{C}) - \phi(\lambda_*, \mathcal{C})| \\ &\leq |\phi(\lambda_{k+1}, \mathcal{C}) - \phi(\bar{\lambda}_{k+1}, \mathcal{C})| \\ &\quad + |\phi(\bar{\lambda}_{k+1}, \mathcal{C}) - \hat{\phi}_k(\bar{\lambda}_{k+1}, \mathcal{C})| \\ &\quad + |\hat{\phi}_k(\bar{\lambda}_{k+1}, \mathcal{C}) - \beta| \\ &\leq C \cdot |I_{k+1}| + \Delta_k + \Delta_k \\ &\leq 3C \cdot |I_{k+1}|, \end{aligned}$$

where we use Lemma 5, the fact  $B_{k-1}$  hold, and  $|\hat{\phi}_k(1/2\underline{\gamma}_k + 1/2\bar{\gamma}_k, \mathcal{C}) - \beta| \leq \Delta_k$  for the second inequality while we use  $T \geq \exp(8r^2/C^2)$  for the last inequality.

**Case 3:**  $\hat{\phi}_k(1/2\underline{\gamma}_k + 1/2\bar{\gamma}_k, \mathcal{C}) > \beta + \Delta_k$ .

In this case,  $\lambda_{k+1} = 1/2\underline{\gamma}_k + 1/2\bar{\gamma}_k$  and  $\bar{\lambda}_{k+1} = \bar{\gamma}_k$ . Since  $B_{k-1}$  holds, we get  $\phi(\lambda_{k+1}, \mathcal{C}) > \beta$  and thus  $\lambda_{k+1} \leq \lambda_*$ . Using (7), we have either (a)  $\hat{\phi}_k(\bar{\gamma}_k, \mathcal{C}) < \beta - \Delta_k$  or (b)  $|\hat{\phi}_k(\bar{\gamma}_k, \mathcal{C}) - \beta| \leq \Delta_k$ . If (a) is true then, since  $B_{k-1}$  holds, it must be that  $\phi(\bar{\lambda}_{k+1}, \mathcal{C}) < \beta$  and thus we get  $\lambda_* \in [\lambda_{k+1}, \bar{\lambda}_{k+1}]$  which implies that  $|\phi(\lambda_{k+1}, \mathcal{C}) - \beta| = |\phi(\lambda_{k+1}, \mathcal{C}) - \phi(\lambda_*, \mathcal{C})| \leq C \cdot |I_{k+1}|$  using Lemma 5. If (b) is true then we have:

$$\begin{aligned} |\phi(\lambda_{k+1}, \mathcal{C}) - \beta| &= |\phi(\lambda_{k+1}, \mathcal{C}) - \phi(\lambda_*, \mathcal{C})| \\ &\leq |\phi(\lambda_{k+1}, \mathcal{C}) - \phi(\bar{\lambda}_{k+1}, \mathcal{C})| \\ &\quad + |\phi(\bar{\lambda}_{k+1}, \mathcal{C}) - \hat{\phi}_k(\bar{\lambda}_{k+1}, \mathcal{C})| \\ &\quad + |\hat{\phi}_k(\bar{\lambda}_{k+1}, \mathcal{C}) - \beta| \\ &\leq C \cdot |I_{k+1}| + \Delta_k + \Delta_k \\ &\leq 3C \cdot |I_{k+1}|. \end{aligned}$$

where we use (7), the fact that  $B_{k-1}$  holds, and (b) for the second inequality while we use  $T \geq \exp(8r^2/C^2)$  for the last inequality.  $\square$

## K Proof of Theorem 3

At any round  $t \in \mathbb{N}$ , we bid:

$$b_t = \min(1, \min(1, \max_{\theta \in \mathcal{C}} x_t^\top \theta) / \lambda_t). \quad (8)$$

**Theorem 3.** *Bidding according to (8) incurs a regret  $R_{B,T} = \tilde{O}(\frac{\bar{L} \cdot \mathbb{E}[1/X^\top \theta^*]}{r^2} \cdot \sqrt{T} \cdot \ln(T))$ .*

*Proof.* For any phase  $k \in \mathbb{N}$ , we denote by  $t_k$  the time period at which phase  $k$  starts. Using Lemma 3, we have:

$$\begin{aligned} R_{B,T} &\leq T \cdot R(\lambda_*, \mathcal{C}) - \mathbb{E}\left[\sum_{t=1}^{\tau^*-1} v_t \cdot \mathbb{1}_{b_t \geq p_t}\right] + O\left(\frac{\sqrt{T}}{r}\right) \\ &= T \cdot R(\lambda_*, \mathcal{C}) - \mathbb{E}\left[\sum_{t=1}^{\tau^*} v_t \cdot \mathbb{1}_{b_t \geq p_t}\right] + O\left(\frac{\sqrt{T}}{r}\right). \end{aligned}$$

Since  $\tau^*$  is a stopping time with respect to the sequence  $((x_t, v_t, p_t))_{t \in \mathbb{N}}$  and since  $b_t = \min(1, \min(1, \max_{\theta \in \mathcal{C}} x_t^\top \theta) / \lambda_t)$  is  $\tilde{\mathcal{F}}_{t-1}$ -measurable, we have:

$$\begin{aligned} \mathbb{E}\left[\sum_{t=1}^{\tau^*} v_t \cdot \mathbb{1}_{b_t \geq p_t}\right] &= \sum_{t=1}^{\infty} \mathbb{E}[\mathbb{1}_{\tau^* \geq t} \cdot \mathbb{E}[v_t \mid \tilde{\mathcal{F}}_{t-1}] \cdot \mathbb{1}_{b_t \geq p_t}] \\ &= \sum_{t=1}^{\infty} \mathbb{E}[\mathbb{1}_{\tau^* \geq t} \cdot \min(1, \max_{\theta \in \mathcal{C}} x_t^\top \theta) \cdot \mathbb{1}_{b_t \geq p_t}] \\ &= \mathbb{E}\left[\sum_{t=1}^{\tau^*} \min(1, \max_{\theta \in \mathcal{C}} x_t^\top \theta) \cdot \mathbb{1}_{b_t \geq p_t}\right] \\ &= \sum_{t=1}^T \mathbb{E}[\min(1, \max_{\theta \in \mathcal{C}} x_t^\top \theta) \cdot \mathbb{1}_{b_t \geq p_t}] - \mathbb{E}\left[\sum_{t=\tau^*+1}^T \min(1, \max_{\theta \in \mathcal{C}} x_t^\top \theta) \cdot \mathbb{1}_{b_t \geq p_t}\right] \\ &\geq \sum_{t=1}^T \mathbb{E}[\min(1, \max_{\theta \in \mathcal{C}} x_t^\top \theta) \cdot \mathbb{1}_{b_t \geq p_t}] - \frac{1}{r} \cdot \mathbb{E}\left[\sum_{t=\tau^*+1}^T p_t \cdot \mathbb{1}_{b_t \geq p_t}\right], \end{aligned}$$

where we use  $\min(1, \max_{\theta \in \mathcal{C}} x_t^\top \theta) \leq 1$ ,  $p_t \geq r$ , and the fact that  $v_t$  is independent of  $p_t$  conditioned on  $x_t$ . Observe that:

$$\sum_{t=\tau^*+1}^T p_t \cdot \mathbb{1}_{b_t \geq p_t} = 0 \leq \left(\sum_{t=1}^T p_t \cdot \mathbb{1}_{b_t \geq p_t} - B\right)_+,$$

if  $\tau^* = T + 1$  while:

$$\begin{aligned} \sum_{t=\tau^*+1}^T p_t \cdot \mathbb{1}_{b_t \geq p_t} &\leq \sum_{t=\tau^*+1}^T p_t \cdot \mathbb{1}_{b_t \geq p_t} + \sum_{t=1}^{\tau^*} p_t \cdot \mathbb{1}_{b_t \geq p_t} - B \\ &\leq \left(\sum_{t=1}^T p_t \cdot \mathbb{1}_{b_t \geq p_t} - B\right)_+ \end{aligned}$$

if  $\tau^* < T + 1$  since, in this case, we have run out of resources before round  $T$ , i.e.  $\sum_{t=1}^{\tau^*} p_t \cdot \mathbb{1}_{b_t \geq p_t} \geq B$ . We derive:

$$\begin{aligned} R_{B,T} &\leq T \cdot R(\lambda_*, \mathcal{C}) - \sum_{t=1}^T \mathbb{E}[\min(1, \max_{\theta \in \mathcal{C}} x_t^\top \theta) \cdot \mathbb{1}_{b_t \geq p_t}] + \frac{1}{r} \cdot \mathbb{E}\left[\left(\sum_{t=1}^T p_t \cdot \mathbb{1}_{b_t \geq p_t} - B\right)_+\right] \\ &\quad + O\left(\frac{\sqrt{T}}{r}\right). \end{aligned} \quad (9)$$

We bound the two terms appearing in the right-hand side of (9) separately starting with the first one. Using the shorthand notation:

$$E = \cap_{k=0}^{\bar{k}_T} \{|\hat{\phi}_k(\lambda_k, \mathcal{C}) - \phi(\lambda_*, \mathcal{C})| \leq 4C \cdot |I_k|, |\phi(\lambda_k, \mathcal{C}) - \phi(\lambda_*, \mathcal{C})| \leq 3C \cdot |I_k|\},$$

where  $C = \bar{L} \cdot \mathbb{E}[\frac{1}{X^\top \theta_*}]$ , we have:

$$\begin{aligned} T \cdot R(\lambda_*, \mathcal{C}) - \sum_{t=1}^T \mathbb{E}[\min(1, \max_{\theta \in \mathcal{C}} x_t^\top \theta) \cdot \mathbb{1}_{b_t \geq p_t}] \\ &= \sum_{t=1}^T \{R(\lambda_*, \mathcal{C}) - \mathbb{E}[\min(1, \max_{\theta \in \mathcal{C}} x_t^\top \theta) \cdot \mathbb{1}_{\min(1, \max_{\theta \in \mathcal{C}} x_t^\top \theta) \geq \lambda_t \cdot p_t}]\} \\ &= \sum_{t=1}^T \{R(\lambda_*, \mathcal{C}) - \mathbb{E}[\mathbb{E}[\min(1, \max_{\theta \in \mathcal{C}} x_t^\top \theta) \cdot \mathbb{1}_{\min(1, \max_{\theta \in \mathcal{C}} x_t^\top \theta) \geq \lambda_t \cdot p_t} \mid \mathcal{F}_{t-1}]]\} \\ &= \sum_{t=1}^T \{R(\lambda_*, \mathcal{C}) - \mathbb{E}[R(\lambda_t, \mathcal{C})]\} \\ &\leq \sum_{t=1}^T \mathbb{E}[|R(\lambda_*, \mathcal{C}) - R(\lambda_t, \mathcal{C})|] \\ &\leq \frac{1}{r} \cdot \sum_{t=1}^T \mathbb{E}[|\phi(\lambda_*, \mathcal{C}) - \phi(\lambda_t, \mathcal{C})|] \\ &\leq \frac{1}{r} \cdot \sum_{k=0}^{\bar{k}_T} N_k \cdot \mathbb{E}[|\phi(\lambda_*, \mathcal{C}) - \phi(\lambda_k, \mathcal{C})|] \\ &\leq \frac{T}{r} \cdot \mathbb{P}[E^c] + \frac{1}{r} \cdot \sum_{k=0}^{\bar{k}_T} N_k \cdot \mathbb{E}[|\phi(\lambda_*, \mathcal{C}) - \phi(\lambda_k, \mathcal{C})| \cdot \mathbb{1}_E] \\ &\leq 2 \frac{\ln^2(T)}{r} + \frac{3C}{r} \cdot \sum_{k=0}^{\bar{k}_T} N_k \cdot |I_k| \\ &\leq 2 \frac{\ln^2(T)}{r} + \frac{18C}{r^2} \cdot \sum_{k=0}^{\bar{k}_T} 2^k \cdot \ln^2(T) \\ &\leq 2 \frac{\ln^2(T)}{r} + \frac{36C}{r^2} \cdot \sqrt{T} \cdot \ln(T). \end{aligned}$$

To derive the third equality we use the fact that  $\lambda_t$  is  $\mathcal{F}_{t-1}$ -measurable. For the second inequality, we use Lemma 4. For the fourth inequality, we use  $\phi(\lambda_k, \mathcal{C}), \beta \in [0, 1]$ . We use Lemma 8 to derive the fifth inequality while we use Lemma 7 for the last one. We can

now focus on the second term appearing in the right-hand side of (9):

$$\begin{aligned}
\mathbb{E}[(\sum_{t=1}^T p_t \cdot \mathbb{1}_{b_t \geq p_t} - B)_+] &= \mathbb{E}[(\sum_{t=1}^T p_t \cdot \mathbb{1}_{\min(1, \max_{\theta \in \mathcal{C}} x_t^\top \theta) \geq \lambda_t \cdot p_t} - B)_+] \\
&\leq \sum_{k=0}^{\bar{k}_T-1} \mathbb{E}[(\sum_{t=t_k}^{t_{k+1}-1} p_t \cdot \mathbb{1}_{\min(1, \max_{\theta \in \mathcal{C}} x_t^\top \theta) \geq \lambda_k \cdot p_t} - N_k \cdot \beta)_+] \\
&\quad + \mathbb{E}[(\sum_{t=t_{\bar{k}_T}}^T p_t \cdot \mathbb{1}_{\min(1, \max_{\theta \in \mathcal{C}} x_t^\top \theta) \geq \lambda_{\bar{k}_T} \cdot p_t} - (T - \sum_{k=0}^{\bar{k}_T-1} N_k) \cdot \beta)_+] \\
&\leq \sum_{k=0}^{\bar{k}_T-1} N_k \cdot \mathbb{E}[(\hat{\phi}_k(\lambda_k, \mathcal{C}) - \phi(\lambda_*, \mathcal{C}))_+] \\
&\quad + (T - \sum_{k=0}^{\bar{k}_T-1} N_k) \cdot \mathbb{E}[(\hat{\phi}_{\bar{k}_T}(\lambda_{\bar{k}_T}, \mathcal{C}) - \phi(\lambda_*, \mathcal{C}))_+] \\
&\leq T \cdot \mathbb{P}[E^c] + \sum_{k=0}^{\bar{k}_T} N_k \cdot \mathbb{E}[|\hat{\phi}_k(\lambda_k, \mathcal{C}) - \phi(\lambda_*, \mathcal{C})| \cdot \mathbb{1}_E] \\
&\leq 2 \ln^2(T) + 4C \cdot \sum_{k=0}^{\bar{k}_T} N_k \cdot |I_k| \\
&\leq 2 \ln^2(T) + \frac{24C}{r} \cdot \sum_{k=0}^{\bar{k}_T} 2^k \cdot \ln^2(T) \\
&\leq 2 \ln^2(T) + \frac{48C}{r} \cdot \sqrt{T} \cdot \ln(T).
\end{aligned}$$

To derive the second inequality, we use  $\beta \geq \phi(\lambda_*, \mathcal{C})$ . To derive the third inequality, we use  $\hat{\phi}_k(\lambda_k, \mathcal{C}), \phi(\lambda_*, \mathcal{C}) \in [0, 1]$  and  $N_{\bar{k}_T} \geq T - \sum_{k=0}^{\bar{k}_T-1} N_k$ . We use Lemma 8 to derive the fourth inequality while we use Lemma 7 for the last one.  $\square$

## L Proof of Lemma 9

**Lemma 9.** *We have  $Q \leq \bar{Q} = d \cdot \ln(T \cdot d) / \ln(1 + A)$  almost surely.*

*Proof.* We have:

$$\begin{aligned}
\det(M_0) \cdot (1 + A)^Q &\leq \det(M_T) \\
&\leq \det((T \cdot d)I_d) \\
&= (T \cdot d)^d,
\end{aligned}$$

by definition of  $Q$ . The second inequality is obtained using  $\|x_t\|_\infty \leq 1$  (which implies that  $dI_d - x_t x_t^\top$  is positive semidefinite) and the fact that  $\det(B + C) \geq \det(B)$  for positive semidefinite matrices  $B$  and  $C$ . Taking logarithms yields the claim.  $\square$

## M Proof of Theorem 4

At any round  $t \in \mathbb{N}$ , we bid:

$$b_t = \min(1, \min(1, \max_{\theta \in \mathcal{C}_{\tau_t}} x_t^\top \theta) / \lambda_t). \quad (10)$$

**Theorem 4.** *Bidding according to (10) incurs a regret  $R_{B,T} = \tilde{O}(d \cdot \frac{\bar{L} \cdot \mathbb{E}[1/X^\top \theta^*]}{r^2} \cdot f(A) \cdot \sqrt{T})$ , where  $f(A) = 1/\ln(1+A) + \sqrt{1+A}$ .*

*Proof.* For any master phase  $q \in \{0, \dots, \bar{Q}\}$ , we denote by  $t_q \in \mathbb{N}$  the round at which phase  $q$  starts. For any master phase  $q \in \{0, \dots, \bar{Q}\}$ , any phase  $k \in \{0, \dots, \bar{k}_T\}$ , and any  $\lambda \geq 0$ , we denote by  $\hat{\phi}_{q,k}(\lambda, \mathcal{C}_q)$  the empirical estimate of  $\phi(\lambda, \mathcal{C}_q)$  using all  $N_k$  samples obtained during the  $k$ -th phase of the binary search that runs during the  $q$ -th master phase. We also use the shorthand notations  $E = \{\theta_* \in \cap_{t=1}^T \mathcal{C}_t\}$  and:

$$E_q = \cap_{k=0}^{\bar{k}_T} \{|\hat{\phi}_{q,k}(\lambda_{q,k}, \mathcal{C}_q) - \phi(\lambda_{q,*}, \mathcal{C}_q)| \leq 4C \cdot |I_k|, |\phi(\lambda_{q,k}, \mathcal{C}_q) - \phi(\lambda_{q,*}, \mathcal{C}_q)| \leq 3C \cdot |I_k|\},$$

for any  $q \in \{0, \dots, \bar{Q}\}$ . Using the same analysis as in the proof of Theorem 3 with  $\mathcal{C} = \{\theta_*\}$  (see (9)), we derive:

$$R_{B,T} \leq T \cdot R(\lambda_*, \{\theta_*\}) - \sum_{t=1}^T \mathbb{E}[x_t^\top \theta_* \cdot \mathbb{1}_{b_t \geq p_t}] + \frac{1}{r} \cdot \mathbb{E}[(\sum_{t=1}^T p_t \cdot \mathbb{1}_{b_t \geq p_t} - B)_+] + O(\frac{\sqrt{T}}{r}). \quad (11)$$

We first study the third term in (11). Observe that, along the same lines as what is done in the proof of Theorem 3, we have:

$$\begin{aligned} \mathbb{E}[(\sum_{t=1}^T p_t \cdot \mathbb{1}_{b_t \geq p_t} - B)_+] &\leq \mathbb{E}[(\sum_{t=1}^T p_t \cdot \mathbb{1}_{b_t \geq p_t} - B)_+ \cdot \mathbb{1}_E] + T \cdot \mathbb{P}[E] \\ &\leq \mathbb{E}[\sum_{q=0}^{\bar{Q}} \sum_{k=0}^{\bar{k}_q} N_k \cdot |\hat{\phi}_{q,k}(\lambda_{q,k}, \mathcal{C}_q) - \phi(\lambda_{q,*}, \mathcal{C}_q)| \cdot \mathbb{1}_E] + 1 \\ &\leq \mathbb{E}[\sum_{q=0}^{\bar{Q}} \sum_{k=0}^{\bar{k}_q} 4N_k \cdot C \cdot |I_k|] + T \cdot \sum_{q=0}^{\bar{Q}} \mathbb{P}[E_q^c \cap E] + O(1) \\ &\leq \frac{24C}{r} \cdot \sum_{q=0}^{\bar{Q}} \sum_{k=0}^{\bar{k}_T} 2^k \cdot \ln^2(T) + 2 \ln^2(T) \cdot (\bar{Q} + 1) + O(1) \\ &\leq \frac{48C}{r} \cdot \sqrt{T} \cdot \ln(T) \cdot (\bar{Q} + 1) + 2 \ln^2(T) \cdot (\bar{Q} + 1) + O(1) \\ &= O(\frac{d \cdot C}{r \cdot \ln(1+A)} \cdot \sqrt{T} \cdot \ln^2(T \cdot d)) \\ &= \tilde{O}(\frac{d \cdot C}{r \cdot \ln(1+A)} \cdot \sqrt{T}). \end{aligned}$$

We use the same analysis as in the proof of Theorem 3 along with Lemma 2 to derive the second inequality. We use Lemma 8 for the fourth inequality and we use Lemma 9 to get the final asymptotic bound. We move on to study the second term in (11). Denoting by  $\tilde{\theta}_t$  an arbitrary element of  $\operatorname{argmax}_{\theta \in \mathcal{C}_{\tau_t}} x_t^\top \theta$ , we have:

$$\begin{aligned} \sum_{t=1}^T \mathbb{E}[x_t^\top \theta_* \cdot \mathbb{1}_{b_t \geq p_t}] &= \sum_{t=1}^T \mathbb{E}[\min(1, \max_{\theta \in \mathcal{C}_{\tau_t}} x_t^\top \theta) \cdot \mathbb{1}_{b_t \geq p_t}] \\ &\quad - \mathbb{E}[\sum_{t=1}^T (\min(1, \max_{\theta \in \mathcal{C}_{\tau_t}} x_t^\top \theta) - x_t^\top \theta_*) \cdot \mathbb{1}_{b_t \geq p_t}] \\ &\geq \sum_{t=1}^T \mathbb{E}[R(\lambda_t, \mathcal{C}_{\tau_t})] - \mathbb{E}[\sum_{t=1}^T |x_t^\top \tilde{\theta}_t - x_t^\top \theta_*| \cdot \mathbb{1}_{b_t \geq p_t}] \\ &\geq \sum_{t=1}^T \mathbb{E}[R(\lambda_t, \mathcal{C}_{\tau_t})] + \tilde{O}(d \cdot \sqrt{A \cdot T}), \end{aligned}$$

where the last inequality is obtained in the proof of Theorem 2. Hence, what remains to be done to get the regret bound is to upper bound:

$$T \cdot R(\lambda_*, \{\theta_*\}) - \sum_{t=1}^T \mathbb{E}[R(\lambda_t, \mathcal{C}_{\tau_t})].$$

First note that:

$$\begin{aligned} & \mathbb{E} \left[ \left| \sum_{t=1}^T R(\lambda_t, \mathcal{C}_{\tau_t}) - \sum_{q=0}^Q (t_{q+1} - t_q) \cdot R(\lambda_{q,*}, \mathcal{C}_q) \right| \right] \\ & \leq \mathbb{E} \left[ \sum_{q=0}^Q \sum_{k=0}^{\bar{k}_q} N_k \cdot |R(\lambda_{q,k}, \mathcal{C}_q) - R(\lambda_{q,*}, \mathcal{C}_q)| \right] \\ & \leq \frac{1}{r} \cdot \mathbb{E} \left[ \sum_{q=0}^Q \sum_{k=0}^{\bar{k}_q} N_k \cdot |\phi(\lambda_{q,k}, \mathcal{C}_q) - \phi(\lambda_{q,*}, \mathcal{C}_q)| \right] \\ & \leq \frac{1}{r} \cdot (T \cdot \mathbb{P}[E] + \sum_{q=0}^{\bar{Q}} T \cdot \mathbb{P}[E_q^c \cap E] + \sum_{q=0}^{\bar{Q}} \sum_{k=0}^{\bar{k}_T} 3N_k \cdot C \cdot |I_k|) \\ & \leq \frac{1}{r} \cdot (1 + 2\ln^2(T) \cdot (\bar{Q} + 1) + \frac{48C}{r} \cdot \sqrt{T} \cdot \ln(T) \cdot (\bar{Q} + 1)) \\ & = \tilde{O} \left( \frac{d \cdot C}{r^2 \cdot \ln(1 + A)} \cdot \sqrt{T} \right). \end{aligned}$$

We derive the second inequality using Lemma 4 We derive the fourth inequality using Lemma 2 and Lemma 8 in the same fashion as done for the third term in (11). We conclude that all that is left to be done is to upper bound:

$$T \cdot R(\lambda_*, \{\theta_*\}) - \mathbb{E} \left[ \sum_{q=0}^Q (t_{q+1} - t_q) \cdot R(\lambda_{q,*}, \mathcal{C}_q) \right],$$

which we do next. Using Lemma 3, observe that, conditioned on  $\mathcal{F}_{t_q-1}$  and assuming that  $\theta_* \in \mathcal{C}_q$ ,  $R(\lambda_{q,*}, \mathcal{C}_q)$  is almost surely larger than  $\text{ER}_{\text{OPT}}(B, T)/T - 1/(r \cdot \sqrt{T}) - 1/T$  by definition of  $\lambda_{q,*}$  when  $\mathcal{C} = \mathcal{C}_q$ . Note that bidding  $\tilde{b}_t = \min(x_t^\top \theta_*/\lambda_*, 1)$  at any time period  $t$  is a valid algorithm for this problem that yields an expected total reward:

$$\begin{aligned} & \mathbb{E} \left[ \sum_{t=1}^{\tau^*} v_t \cdot \mathbb{1}_{\tilde{b}_t \geq p_t} \right] \\ & \geq T \cdot \mathbb{E}[\min(1, \max_{\theta \in \mathcal{C}_q} X^\top \theta) \cdot \mathbb{1}_{X^\top \theta_* \geq \lambda_* \cdot P}] - \frac{1}{r} \cdot \mathbb{E} \left[ \left( \sum_{t=1}^T p_t \cdot \mathbb{1}_{\tilde{b}_t \geq p_t} - B \right)_+ \right] \\ & \geq T \cdot \mathbb{E}[\min(1, \max_{\theta \in \mathcal{C}_q} X^\top \theta) \cdot \mathbb{1}_{X^\top \theta_* \geq \lambda_* \cdot P}] - \frac{1}{r} \cdot \mathbb{E} \left[ \left| \sum_{t=1}^T p_t \cdot \mathbb{1}_{\tilde{b}_t \geq p_t} - T \cdot \phi(\lambda_*, \{\theta_*\}) \right| \right] \\ & \geq T \cdot \mathbb{E}[\min(1, \max_{\theta \in \mathcal{C}_q} X^\top \theta) \cdot \mathbb{1}_{X^\top \theta_* \geq \lambda_* \cdot P}] - \frac{\sqrt{T}}{r}, \end{aligned}$$

where the expectations are all conditioned on  $\mathcal{F}_{t_q-1}$  and the inequalities hold almost surely. The first inequality is derived in the same fashion as done in the proof of Theorem 3 to derive (9). The second inequality is a consequence of  $B = \beta \cdot T$  and  $\phi(\lambda_*, \{\theta_*\}) \leq \beta$ . The third inequality is obtained with Khintchine's inequality (by symmetrization) since  $p_t \in [0, 1]$  and  $(p_t \cdot \mathbb{1}_{\tilde{b}_t \geq p_t})_{t \in \mathbb{N}}$  is an i.i.d. stochastic process with mean  $\phi(\lambda_*, \{\theta_*\})$ . We

conclude that:

$$\begin{aligned}
R(\lambda_{q,*}, \mathcal{C}_q) &\geq \mathbb{E}[\min(1, \max_{\theta \in \mathcal{C}_q} X^\top \theta) \cdot \mathbb{1}_{X^\top \theta_* \geq \lambda_* \cdot P} | \mathcal{F}_{t_q-1}] - \frac{2}{r \cdot \sqrt{T}} - \frac{1}{T} \\
&\geq \mathbb{E}[X^\top \theta_* \cdot \mathbb{1}_{X^\top \theta_* \geq \lambda_* \cdot P} | \mathcal{F}_{t_q-1}] - \frac{2}{r \cdot \sqrt{T}} - \frac{1}{T} \\
&= R(\lambda_*, \{\theta_*\}) - \frac{2}{r \cdot \sqrt{T}} - \frac{1}{T}
\end{aligned}$$

almost surely as long as  $\theta_* \in \mathcal{C}_q$ . This implies that:

$$\begin{aligned}
T \cdot R(\lambda_*, \{\theta_*\}) - \mathbb{E}[\sum_{q=0}^Q (t_{q+1} - t_q) \cdot R(\lambda_{q,*}, \mathcal{C}_q)] \\
&= \mathbb{E}[\sum_{q=0}^Q (t_{q+1} - t_q) \cdot (R(\lambda_*, \{\theta_*\}) - R(\lambda_{q,*}, \mathcal{C}_q))] \\
&\leq \mathbb{E}[\sum_{q=0}^Q (t_{q+1} - t_q) \cdot (\mathbb{1}_E + \frac{2}{r \cdot \sqrt{T}} + \frac{1}{T})] \\
&\leq T \cdot \mathbb{P}[E] + 2 \frac{\sqrt{T}}{r} + 1 \\
&= O(\frac{\sqrt{T}}{r}),
\end{aligned}$$

where we use Lemma 2 for the last step. This concludes the proof.  $\square$

## References

- [1] Y. Abbasi-Yadkori, D. Pál, and C. Szepesvári. Improved algorithms for linear stochastic bandits. In *Adv. Neural Inform. Processing Systems*, pages 2312–2320, 2011.
- [2] P. Auer. Using confidence bounds for exploitation-exploration trade-offs. *J. Machine Learning Res.*, 3(Nov):397–422, 2002.
- [3] P. Bartlett and S. Mendelson. Rademacher and gaussian complexities: Risk bounds and structural results. *J. Machine Learning Res.*, 3(Nov):463–482, 2002.
- [4] S. Boucheron, O. Bousquet, and G. Lugosi. Theory of classification: A survey of some recent advances. *ESAIM: Probability and Statist.*, 9:323–375, 2005.
- [5] G. Lueker. Average-case analysis of off-line and on-line knapsack problems. *Journal of Algorithms*, 29(2):277–305, 1998.
